# Supplementary material for: iE-DAP Induced Inflammatory Response and Tight Junction Disruption in Bovine Mammary Epithelial Cells via NOD1-Dependent NF-κB and MLCK Signaling Pathway
Source: MDPI journal article supplement (doi:10.3390/ijms24076263), 2023-03-27
Supplement: s1 [file s1]

## Supplementary materials

**Table S1.** Primer sequences used for real-time quantitative PCR

| Gene         | Forward primer (5'-3')      | Reverse primer (5'-3')     | NCBI accession | length(bp) |
|--------------|-----------------------------|----------------------------|----------------|------------|
| IL-1 $\beta$ | CTATTCTCTCCAGCCAACC<br>TTC  | CTCGTCACTGTAGTAAGCCA<br>TC | NM_174093.1    | 100        |
| IL-6         | GGAGGAAAAGGACGGAT<br>GCT    | GGTCAGTGTTTGTGGCTGGA       | NM_173923.2    | 227        |
| IL-8         | CCTCTTGTTCAATATGACT<br>TCCA | GGCCCACTCTCAATAACTCT<br>C  | NM_173925.2    | 189        |
| ZO-1         | GCGAAATGAGAAACAAGC<br>ACC   | ATGAGTTGAGTTGGGCAGG<br>AC  | XM_024982012.1 | 121        |
| Occludin     | CAGCAGCAGTGGTAACTT<br>GGA   | CCGGTCGTGTAGTCTGTTTC<br>AT | NM_001082433.2 | 111        |
| GAPDH        | GGGTCATCATCTCTGCAC<br>CT    | GGTCATAAGTCCCTCCACGA       | NM_001034034.2 | 176        |

**Table S2.** Information of the antibodies used in western blotting analysis and cellular immunofluorescence

| Target protein                    | Catalog number | Application        | Company                  |
|-----------------------------------|----------------|--------------------|--------------------------|
| NOD1                              | SC22045        | Primary antibody   | Santa Cruz Biotechnology |
| NF- $\kappa$ B p65                | AF1234         | Primary antibody   | Beyotime Biotechnology   |
| phosphorylated NF- $\kappa$ B p65 | AN371          | Primary antibody   | Affinity Biosciences LTD |
| ZO-1                              | 21773-1        | Primary antibody   | Proteintech Group        |
| Occludin                          | ab167161       | Primary antibody   | Abcam Plc                |
| MLCK                              | AF1678         | Primary antibody   | Beyotime Biotechnology   |
| MLC2                              | DF7911         | Primary antibody   | Affinity Biosciences LTD |
| phosphorylated MLC2               | AF5443         | Primary antibody   | Affinity Biosciences LTD |
| GAPDH                             | 10494-1        | Primary antibody   | Proteintech Group        |
| Anti-rabbit HRP-linked Antibody   | A0208          | Secondary antibody | Beyotime Biotechnology   |
| Anti-mouse HRP-linked Antibody    | A0216          | Secondary antibody | Beyotime Biotechnology   |
| Anti-goat HRP-linked Antibody     | S0010          | Secondary antibody | Affinity Biosciences LTD |
| Anti-rabbit FITC-linked Antibody  | A0208          | Secondary antibody | Beyotime Biotechnology   |
| Anti-mouse FITC-linked Antibody   | A0216          | Secondary antibody | Beyotime Biotechnology   |
